# Supplementary material for: Ultrasonic Evaluation of Diaphragm in Patients with Systemic Sclerosis
Source: MDPI journal article supplement (doi:10.3390/jpm13101441), 2023-09-27
Supplement: s1 [file s1]

Table S2. Warrick score for evaluation of interstitial lung disease

| <b>Severity score</b>                                           | <b>Grade</b> | <b>Extent score*</b> | <b>Grade</b> |
|-----------------------------------------------------------------|--------------|----------------------|--------------|
| ground-glass opacities                                          | 1            | 1–3 segments         | 1            |
| irregularity of the pleura                                      | 2            | 4–9 segments         | 2            |
| septal/subpleural lines                                         | 3            | >9 segments          | 3            |
| honeycombing                                                    | 4            |                      |              |
| subpleural cysts                                                | 5            |                      |              |
| <b>Global score</b> = total severity score + total extent score |              |                      |              |
| *number of segments involved                                    |              |                      |              |
