# Supplementary material for: Ultrasonic Evaluation of Diaphragm in Patients with Systemic Sclerosis
Source: MDPI journal article supplement (doi:10.3390/jpm13101441), 2023-09-27

Figure S1: Correlations of diaphragmatic mobility during deep breathing with evaluated parameters

Figure S1a: Negative correlation between diaphragmatic mobility during deep breathing and Modified Medical Research Council dyspnea scale (mMRC)

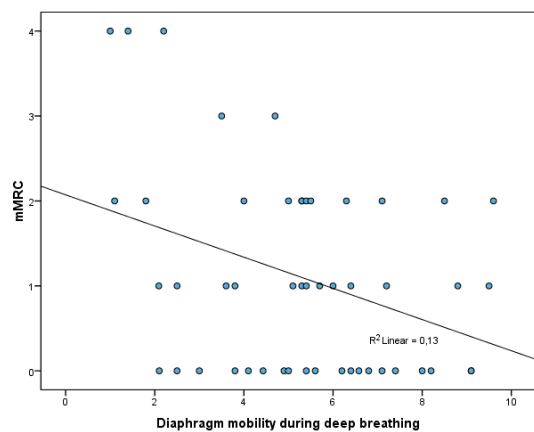

Figure S1b: Negative correlation between diaphragmatic mobility during deep breathing and esophageal diameter on HRCT at location 2

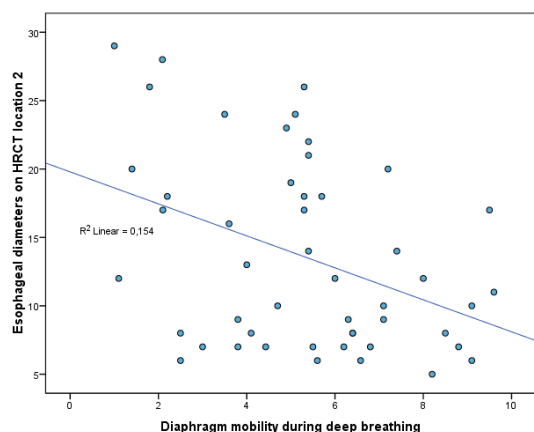

Figure S1c: Negative correlation between diaphragmatic mobility during deep breathing and modified Rodnan skin score (mRSS)

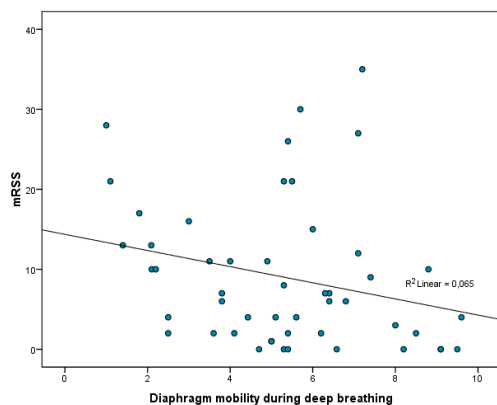

Figure S1d: Positive correlation between diaphragmatic mobility during deep breathing and alveolar volume (VA %)

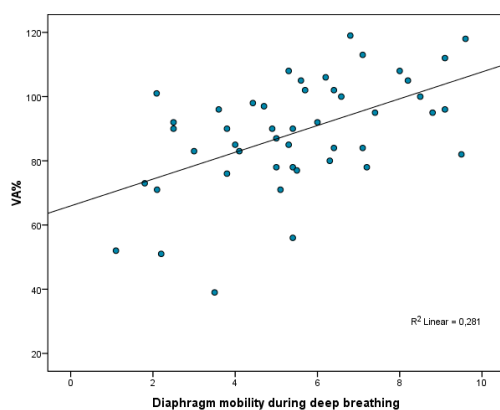

Figure S1e: Positive correlation between diaphragmatic mobility during deep breathing and forced vital capacity (FVC %)

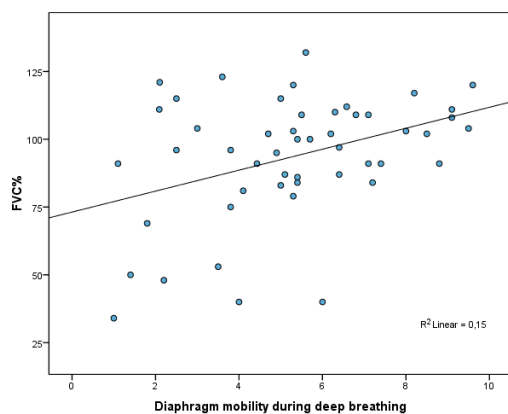

Supplement: s1 [file s1]
