# Supplementary material for: Ultrasonic Evaluation of Diaphragm in Patients with Systemic Sclerosis
Source: MDPI journal article supplement (doi:10.3390/jpm13101441), 2023-09-27
Supplement: s1 [file s1]

Table S3 Correlations between variables of diaphragmatic ultrasonic evaluation and lung function tests, Warrick score, and esophageal diameters on HRCT

Spearman's coefficient of correlation Rho (P-value)

|                                                       | Alveolar<br>volume%                | DLCO%                         | FVC%                          | Severity<br>Warrick score           | Extent<br>Warrick score             | Global<br>Warrick score        | Esophageal<br>diameter 1       | Esophageal<br>diameter 2       | Esophageal<br>diameter 3 |
|-------------------------------------------------------|------------------------------------|-------------------------------|-------------------------------|-------------------------------------|-------------------------------------|--------------------------------|--------------------------------|--------------------------------|--------------------------|
| Diaphragm<br>mobility in<br>deep breathing            | <b>0.501</b><br><b>(&lt;0.001)</b> | 0.273<br>(0.05)               | <b>0.313</b><br><b>(0.03)</b> | <b>-0.414</b><br><b>(&lt;0.001)</b> | <b>-0.397</b><br><b>(&lt;0.001)</b> | <b>-0.339</b><br><b>(0.02)</b> | <b>-0.368</b><br><b>(0.01)</b> | <b>-0.366</b><br><b>(0.01)</b> | -0.182<br>(0.21)         |
| Diaphragm<br>mobility in<br>normal<br>breathing       | 0.193<br>(0.19)                    | 0.078<br>(0.59)               | -0.099<br>(0.50)              | <b>-0.309</b><br><b>(0.03)</b>      | -0.192<br>(0.18)                    | <b>-0.342</b><br><b>(0.01)</b> | -0.177<br>(0.22)               | -0.044<br>(0.76)               | -0.021<br>(0.88)         |
| Diaphragmatic<br>thickening<br>fraction right<br>side | -0.046<br>(0.76)                   | <b>0.313</b><br><b>(0.03)</b> | -0.001<br>(0.99)              | -0.209<br>(0.15)                    | -0.192<br>(0.18)                    | -0.157<br>(0.28)               | -0.144<br>(0.32)               | <b>-0.321</b><br><b>(0.02)</b> | -0.247<br>(0.09)         |
| Diaphragmatic<br>thickness right<br>side              |                                    |                               |                               |                                     |                                     |                                |                                |                                |                          |
| At FRC                                                | 0.154<br>(0.30)                    | -0.074<br>(0.61)              | 0.26<br>(0.07)                | 0.228<br>(0.11)                     | <b>0.308</b><br><b>(0.03)</b>       | 0.23<br>(0.11)                 | 0.242<br>(0.09)                | <b>0.34</b><br><b>(0.02)</b>   | 0.276<br>(0.05)          |
| At TLC                                                | 0.09<br>(0.55)                     | 0.011<br>(0.94)               | <b>0.285</b><br><b>(0.04)</b> | 0.164<br>(0.25)                     | 0.219<br>(0.13)                     | 0.155<br>(0.28)                | 0.087<br>(0.55)                | 0.214<br>(0.14)                | 0.12<br>(0.41)           |

DLCO-diffusing capacity for carbon monoxide, FVC-forced vital capacity, FEV1-forced expiratory volume in the first second, FRC-functional residual capacity, TLC-total lung capacity
