# Supplementary material for: Ultrasonic Evaluation of Diaphragm in Patients with Systemic Sclerosis
Source: MDPI journal article supplement (doi:10.3390/jpm13101441), 2023-09-27
Supplement: s1 [file s1]

Table S4. Multivariate regression analysis according to interstitial lung disease

| Multivariate logistic regression       | $\beta$ | P value | OR   | 95% CI       |
|----------------------------------------|---------|---------|------|--------------|
| Esophageal diameter at location 1 (mm) | 0.56    | 0.005   | 1.76 | 1.19 do 2.60 |
| Constant                               | -4.4    | 0.001   | 0.01 |              |

$\beta$  – regression coefficient
